# Supplementary material for: MIL-101(Cr)/aminoclay nanocomposites for conversion of CO2 into cyclic carbonates
Source: Royal Society of Chemistry journal article supplement (doi:10.1039/d4dt00849a), 2024-01-01
Supplement: d4dt00849a1.pdf [file d4dt00849a1.pdf]

## Supporting Information

### **MIL-101(Cr)/Aminoclay Nanocomposites for Conversion of CO<sub>2</sub> into Cyclic Carbonates**

Jyoti,<sup>a</sup> Sarita Kumari,<sup>a</sup> Samiran Chakraborty,<sup>a</sup> Prakash Kanoo,<sup>ab</sup> Vinod Kumar<sup>a</sup> and Anindita Chakraborty\*<sup>a</sup>

<sup>a</sup>*Department of Chemistry, School of Basic Sciences, Central University of Haryana, Mahendergarh 123031, Haryana, India*

<sup>b</sup>*Special Centre for Nano Sciences, Jawaharlal Nehru University, New Mehrauli Road, New Delhi, Delhi 110067, India*

## Table of Contents

|                                                                                                                                              |        |
|----------------------------------------------------------------------------------------------------------------------------------------------|--------|
| PXRD pattern of AC.....                                                                                                                      | 3      |
| FT-IR spectra of AC, PMIL and MIL-101(Cr)/AC-1 .....                                                                                         | 4      |
| TGA profiles of synthesized materials .....                                                                                                  | 4      |
| FESEM images and the particle size distribution histograms .....                                                                             | 5-7    |
| EDX spectrum of MIL-101(Cr)/AC-2 .....                                                                                                       | 8      |
| Dispersion test of PMIL and MIL-101(Cr)/AC-2 .....                                                                                           | 8      |
| Pore size distribution plots .....                                                                                                           | 9      |
| Temperature programmed desorption profiles of MIL-101(Cr)/AC-2 .....                                                                         | 10     |
| <sup>1</sup> H NMR spectra for the cycloaddition reaction using MIL-101(Cr)/AC-2 as a catalyst with epichlorohydrin .....                    | 11     |
| FT-IR spectra of EPH and reaction mixture of the product formed in the cycloaddition reaction with EPH using catalyst MIL-101(Cr)/AC-2 ..... | 12     |
| Optimization table for cycloaddition of CO <sub>2</sub> to epichlorohydrin using different catalysts.....                                    | 13     |
| <sup>1</sup> H NMR spectra for the cycloaddition reaction using different catalysts with epichlorohydrin .....                               | 144-15 |
| PXRD patterns of MIL-101(Cr)/AC-2 before catalytic run and after 5 <sup>th</sup> cycle of the catalysis....                                  | 16     |
| FT-IR spectra of MIL-101(Cr)/AC-2 before catalytic run and after 5 <sup>th</sup> cycle of the catalysis .....                                | 16     |
| Optimization table for cycloaddition of CO <sub>2</sub> to styrene oxide using PMIL and MIL-101(Cr)/AC-2 as catalysts.....                   | 17     |
| Different substrates and their dimensions.....                                                                                               | 18     |
| <sup>1</sup> H NMR spectra for the cycloaddition reaction using MIL-101(Cr)/AC-2 as a catalyst with different substrates .....               | 19     |
| A comparison of the catalytic activity of different MIL-101(Cr)-based MOF catalysts with MIL-101(Cr)/AC-2 .....                              | 24     |

## PXRD pattern of AC

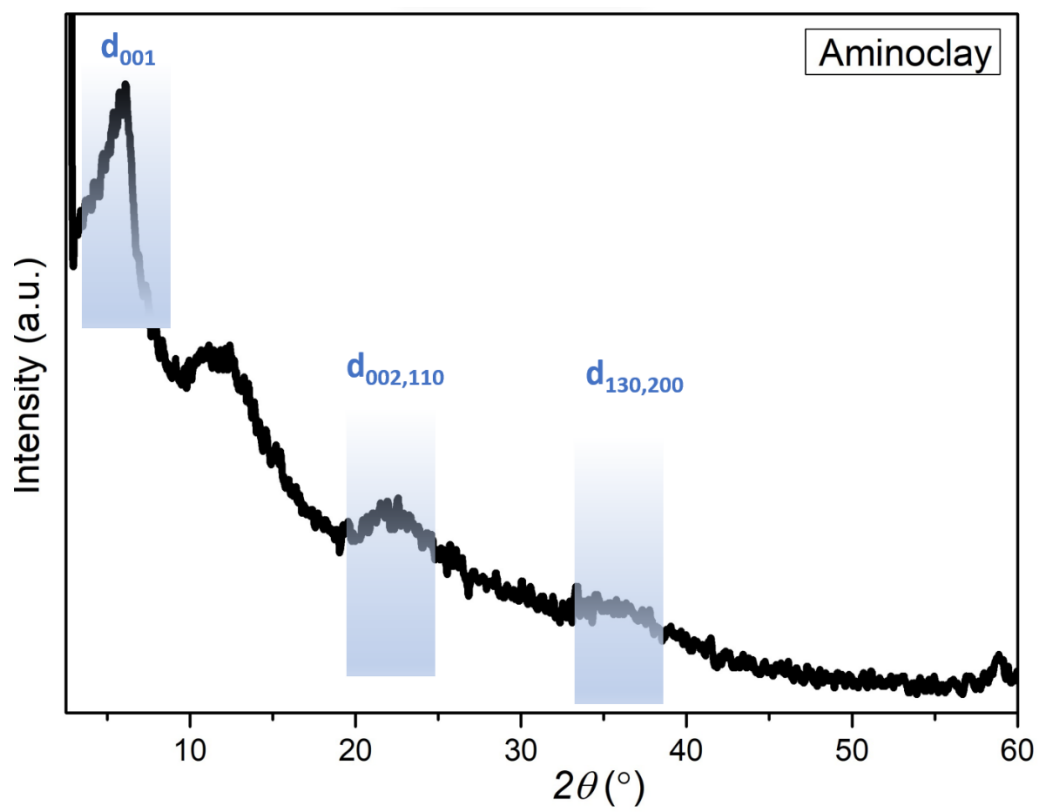

**Fig. S1** PXRD pattern of AC. The  $d_{001}$ ,  $d_{002}$  and  $d_{130}$  peaks are highlighted.

## FT-IR spectra of AC, PMIL and MIL-101(Cr)/AC-1

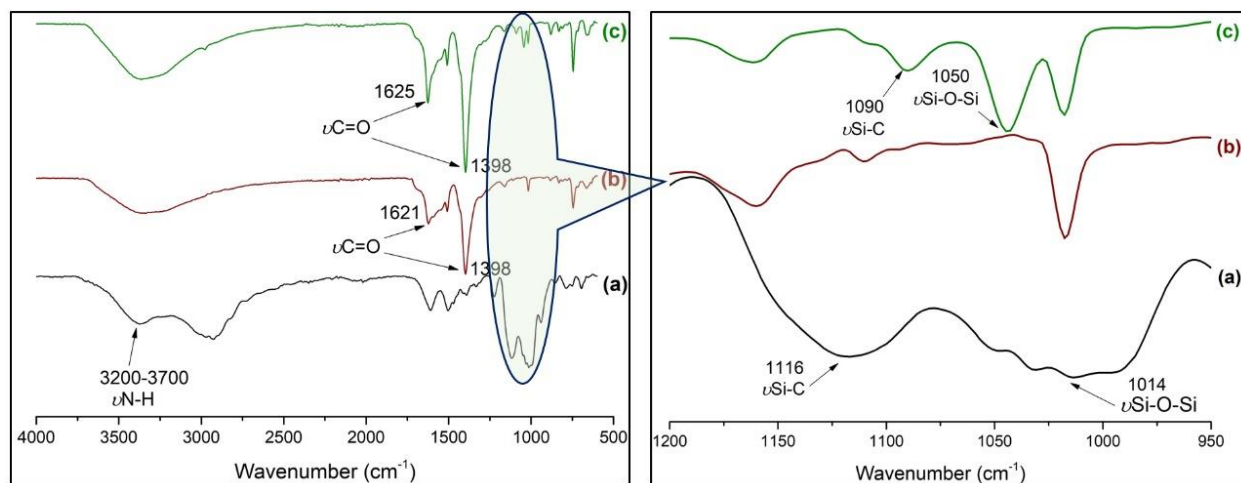

Fig. S2 FT-IR spectra of (a) AC, (b) PMIL and (c) MIL-101(Cr)/AC-1.

## TGA profiles of synthesized materials

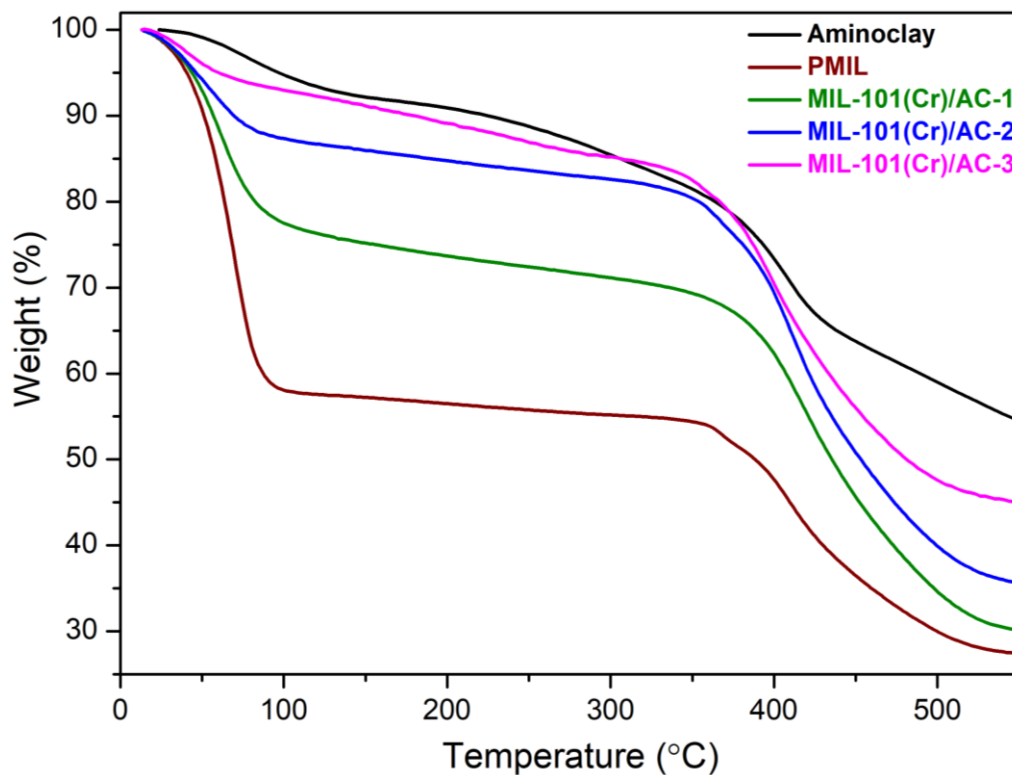

Fig. S3 TGA profiles of PMIL, AC, MIL-101(Cr)/AC-1, MIL-101(Cr)/AC-2 and MIL-101(Cr)/AC-3.

## FESEM images and the particle size distribution histograms

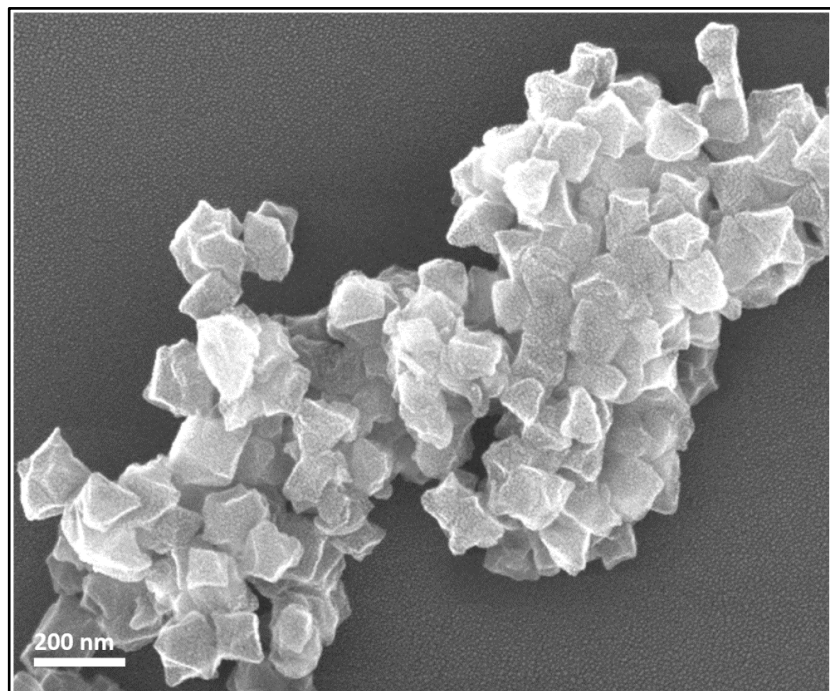

**Fig. S4** FESEM image of **PMIL**.

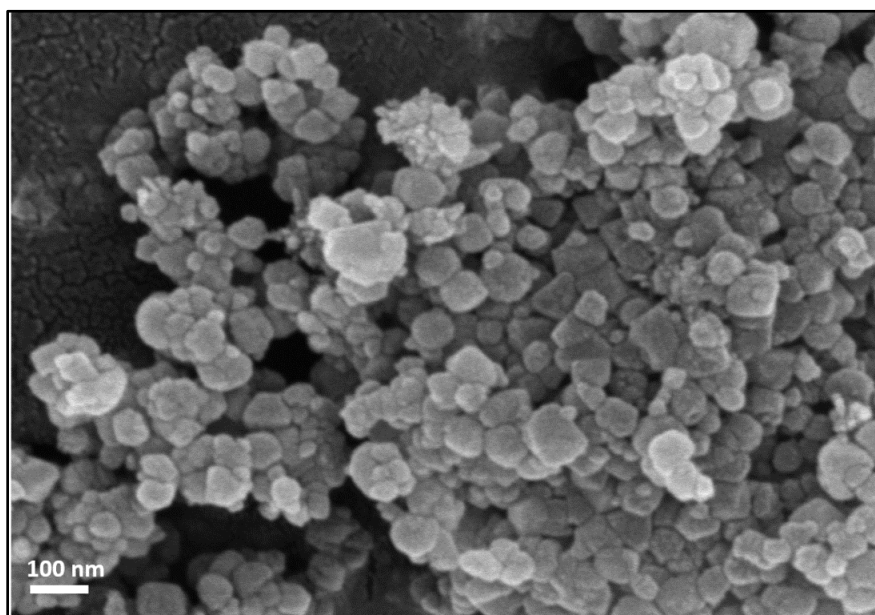

**Fig. S5** FESEM image of **MIL-101(Cr)/AC-1**.

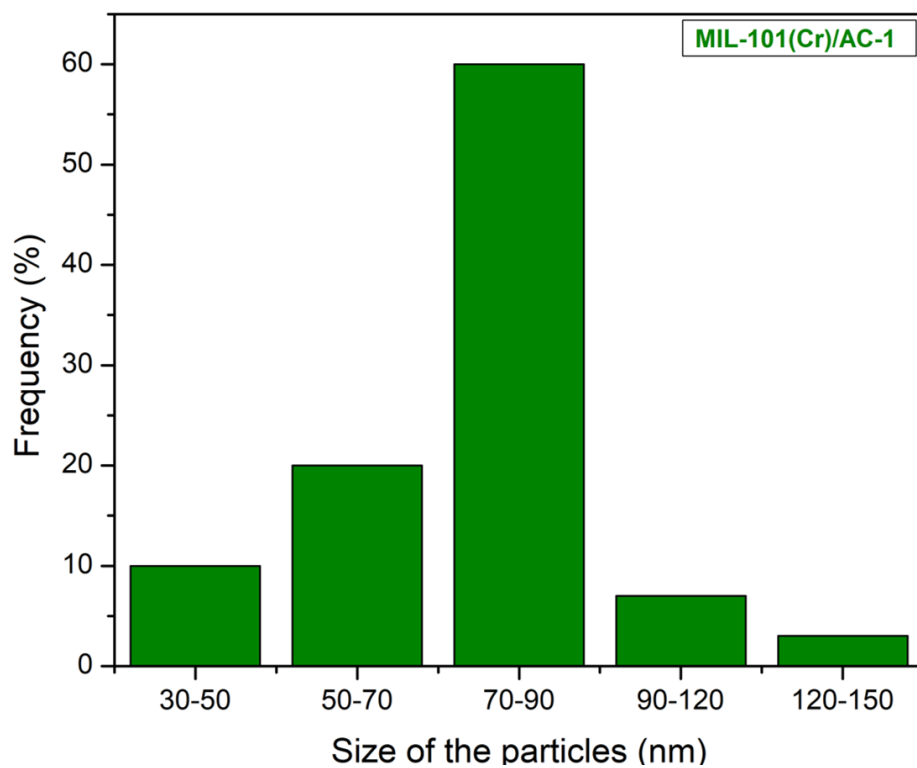

**Fig. S6** The particle size distribution histogram plot of **MIL-101(Cr)/AC-1**.

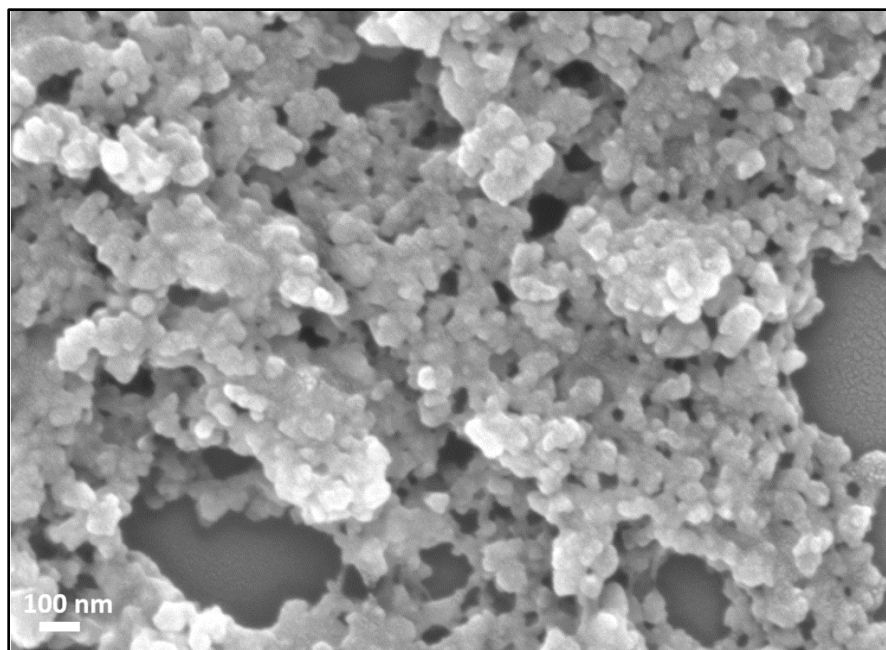

**Fig. S7** FESEM image of **MIL-101(Cr)/AC-2**.

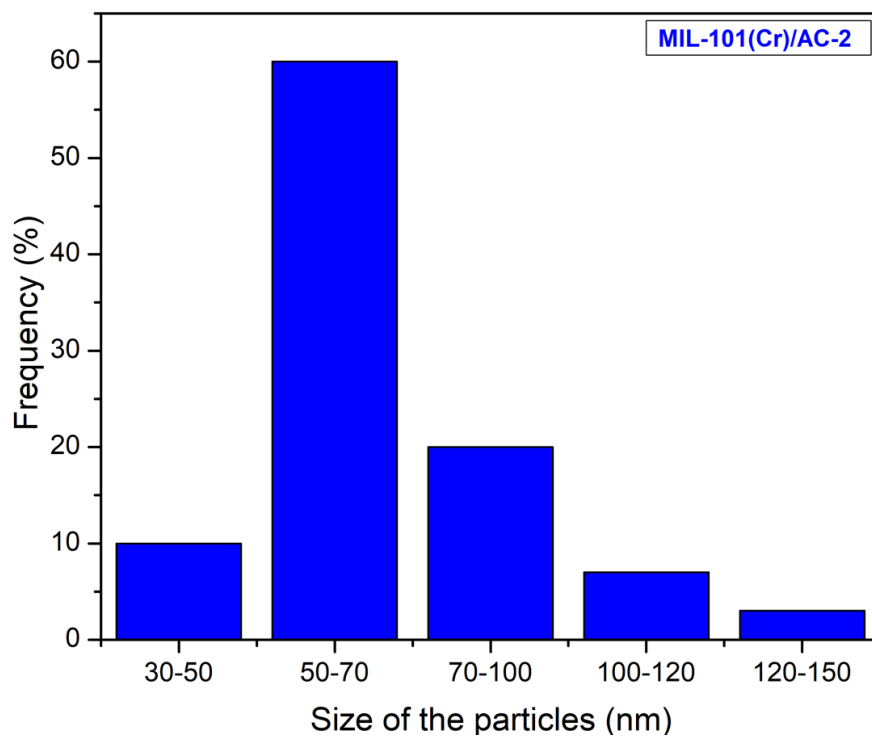

**Fig. S8** The particle size distribution histogram plot of **MIL-101(Cr)/AC-2**.

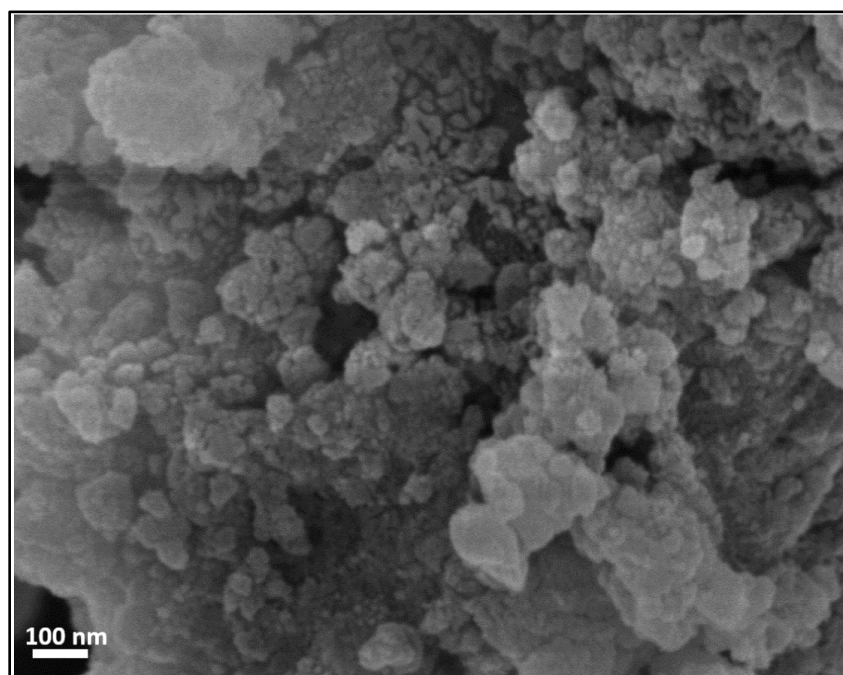

**Fig. S9** FESEM images of **MIL-101(Cr)/AC-3**.

### EDX spectrum of MIL-101(Cr)/AC-2

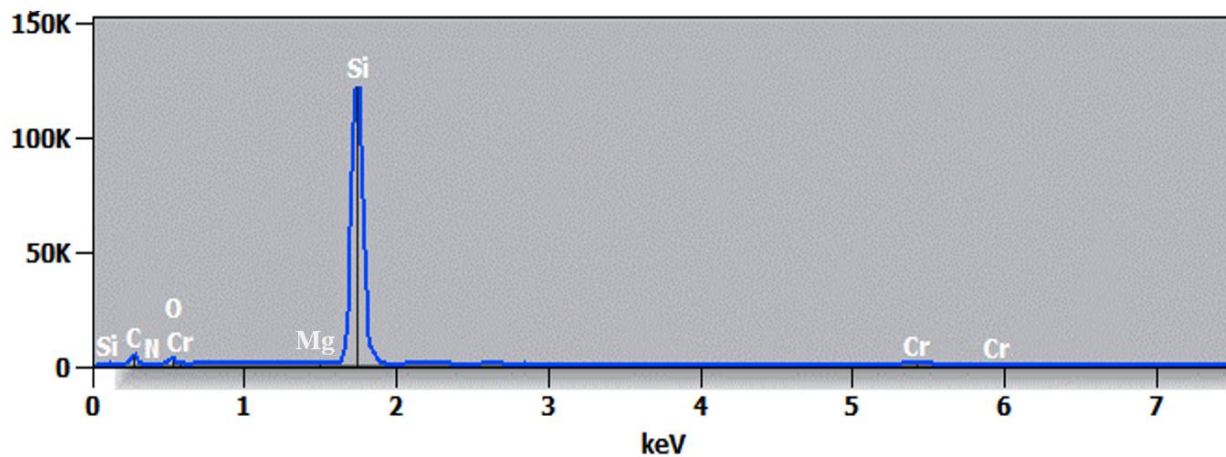

Fig. S10 EDX spectrum of MIL-101(Cr)/AC-2.

### Dispersion test of PMIL and MIL-101(Cr)/AC-2

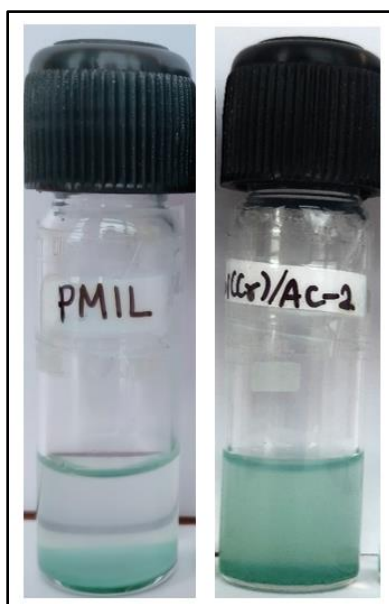

Fig. S11 Dispersion of samples in methanol (a) as-synthesized **PMIL** after 15 minutes and (b) **MIL-101(Cr)/AC-2** after 4 days.



## Pore size distribution plots

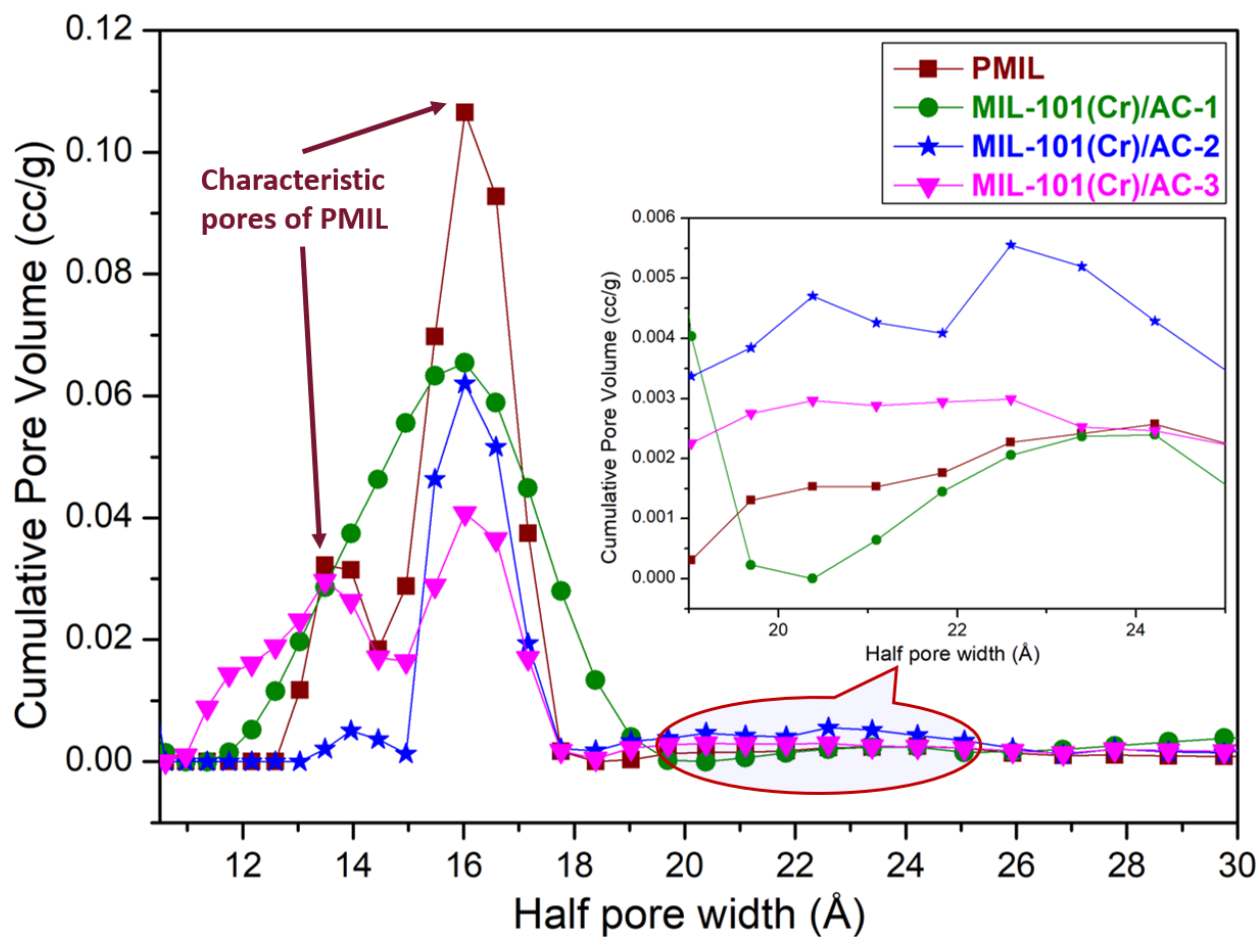

**Fig. S12** Pore size distribution plots of PMIL, MIL-101(Cr)/AC-1, MIL-101(Cr)/AC-2 and MIL-101(Cr)/AC-3. Inset shows the presence of large pores at the MOF-clay interface in case of MIL-101(Cr)/AC-2 composite.

## Temperature programmed desorption profiles of MIL-101(Cr)/AC-2

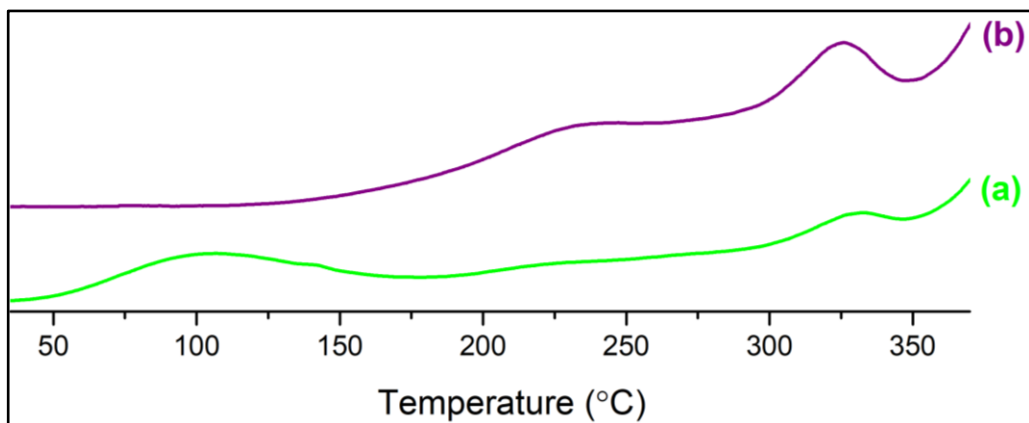

**Fig. S13** Temperature programmed desorption profiles of **MIL-101(Cr)/AC-2** (a)  $\text{NH}_3$  desorption and (b)  $\text{CO}_2$  desorption.

**$^1\text{H}$  NMR spectrum for the cycloaddition reaction using MIL-101(Cr)/AC-2 as a catalyst with epichlorohydrin**

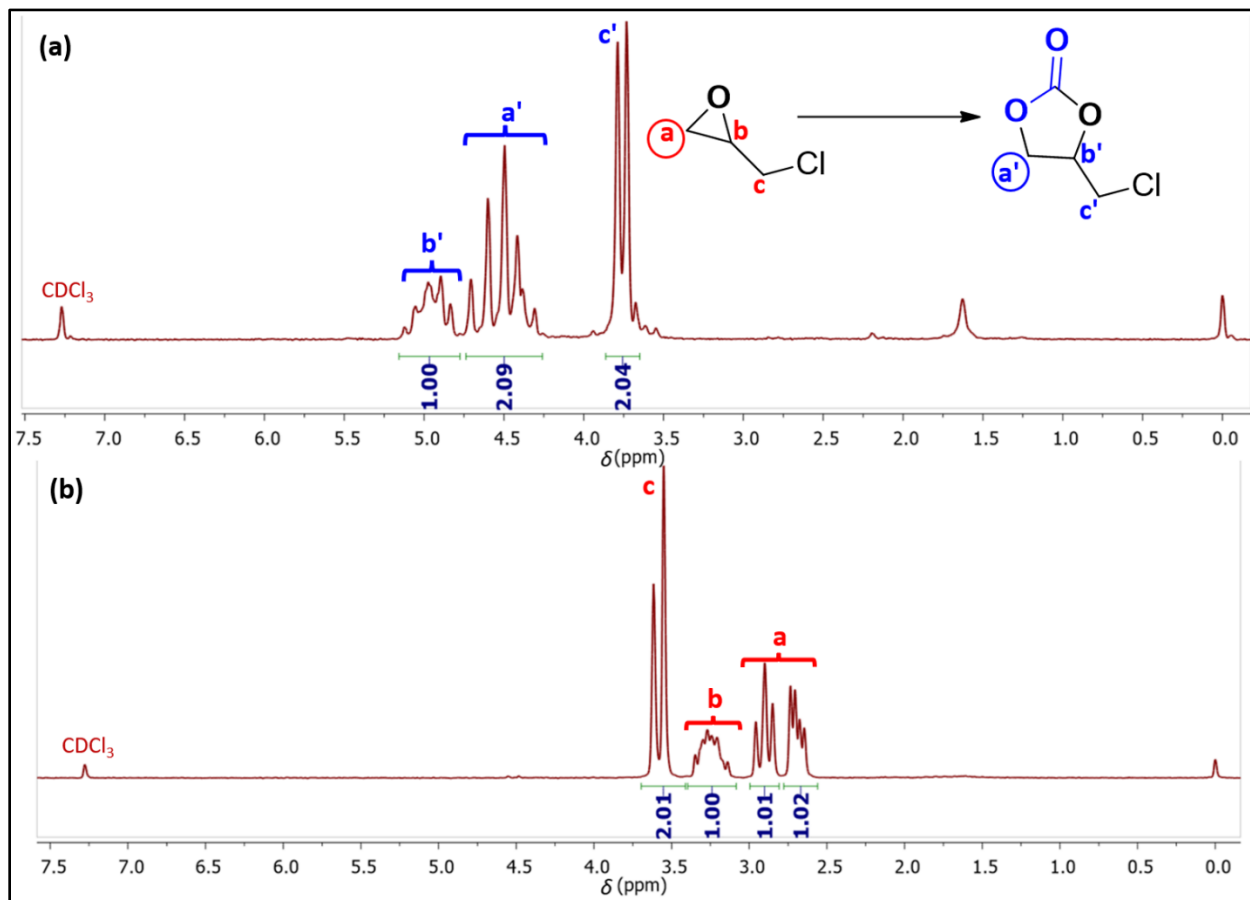

**Fig. S14** The  $^1\text{H}$  NMR spectra (in  $\text{CDCl}_3$ ) (a) Purified product for the cycloaddition reaction of epichlorohydrin with  $\text{CO}_2$  using MIL-101(Cr)/AC-2 as a catalyst. Reaction condition: 9.2 mmol of epichlorohydrin, 0.92 mmol of  $\text{TBA}^+\text{Br}^-$  (co-catalyst), 30 mg of catalyst,  $30^\circ\text{C}$ , 1 bar of  $\text{CO}_2$ , 6 h. Conversion = 99.9% (b) Pure epichlorohydrin (reactant) before  $\text{CO}_2$  cycloaddition reaction. Comparing both spectra (a and b) reveals that, in the purified product spectrum there is no traces of the reactant, indicating the completion of the reaction.

FT-IR spectra of EPH and reaction mixture of the product formed in the cycloaddition reaction with EPH using catalyst MIL-101(Cr)/AC-2

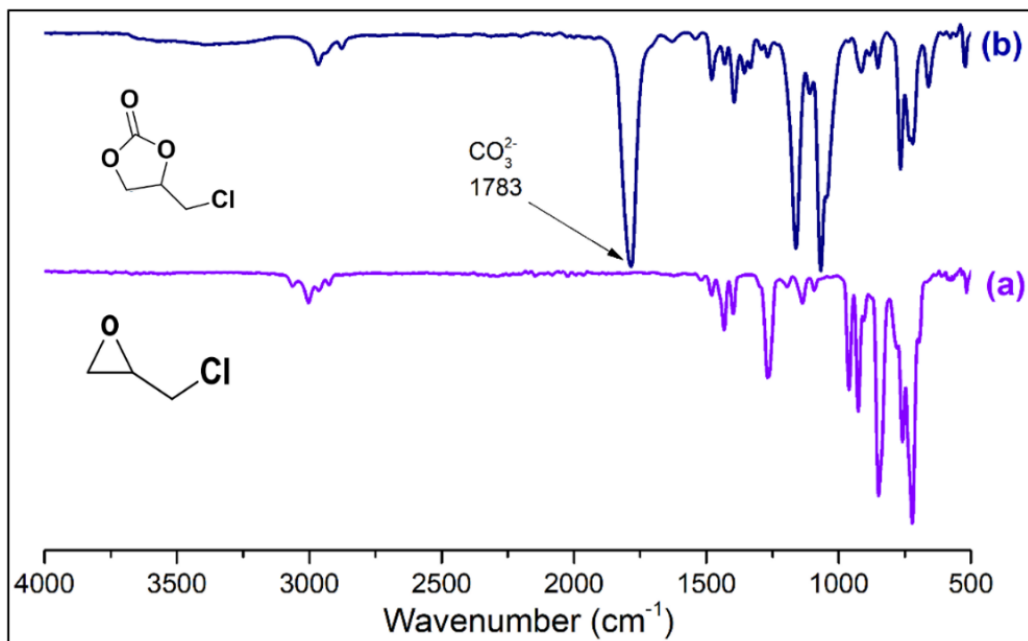

**Fig. S15** FT-IR spectra of (a) EPH and (b) Reaction mixture of the product formed in the cycloaddition reaction with EPH using catalyst MIL-101(Cr)/AC-2.

## Optimization table for cycloaddition of CO<sub>2</sub> to epichlorohydrin using different catalysts

**Table S1** Cycloaddition of CO<sub>2</sub> with epichlorohydrin using as-synthesized **PMIL** and MIL-101(Cr)/AC composites as catalysts<sup>a</sup>

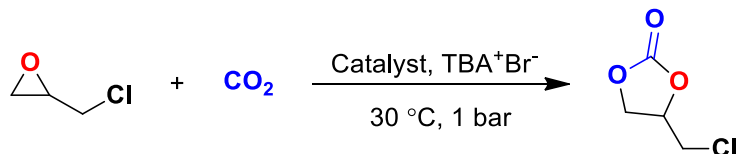

| Entry | Catalysts                                            | Time (h) | Conversion (%) |
|-------|------------------------------------------------------|----------|----------------|
| 1     | AC                                                   | 6        | 10             |
| 2     | Cr(NO <sub>3</sub> ) <sub>3</sub> ·9H <sub>2</sub> O | 6        | 27             |
| 3     | <b>PMIL</b>                                          | 3        | 18             |
| 4     | <b>PMIL</b>                                          | 4        | 20             |
| 5     | <b>PMIL</b>                                          | 5        | 26             |
| 6     | <b>PMIL</b>                                          | 6        | 30             |
| 7     | <b>PMIL</b>                                          | 12       | 80             |
| 8     | <b>PMIL</b>                                          | 24       | 98             |
| 9     | <b>PMIL</b>                                          | 26       | 99.9           |
| 10    | <b>MIL-101(Cr)/AC-1</b>                              | 3        | 17             |
| 11    | <b>MIL-101(Cr)/AC-1</b>                              | 4        | 30             |
| 12    | <b>MIL-101(Cr)/AC-1</b>                              | 5        | 35             |
| 13    | <b>MIL-101(Cr)/AC-1</b>                              | 6        | 44             |
| 14    | <b>MIL-101(Cr)/AC-1</b>                              | 12       | 78             |
| 15    | <b>MIL-101(Cr)/AC-1</b>                              | 24       | 99.9           |
| 16    | <b>MIL-101(Cr)/AC-2</b>                              | 3        | 63             |
| 17    | <b>MIL-101(Cr)/AC-2</b>                              | 4        | 69             |
| 18    | <b>MIL-101(Cr)/AC-2</b>                              | 5        | 92             |
| 19    | <b>MIL-101(Cr)/AC-2</b>                              | 6        | 99.9           |
| 20    | <b>MIL-101(Cr)/AC-3</b>                              | 3        | 6              |
| 21    | <b>MIL-101(Cr)/AC-3</b>                              | 4        | 22             |
| 22    | <b>MIL-101(Cr)/AC-3</b>                              | 5        | 31.5           |
| 23    | <b>MIL-101(Cr)/AC-3</b>                              | 6        | 42             |
| 24    | <b>MIL-101(Cr)/AC-3</b>                              | 12       | 79             |
| 25    | <b>MIL-101(Cr)/AC-3</b>                              | 16       | 99.9           |
| 26    | PMIL+AC <sup>b</sup>                                 | 6        | 5              |
| 27    | TBAB <sup>c</sup>                                    | 6        | 20             |
| 28    | TBAB <sup>d</sup>                                    | 6        | 30             |
| 29    | <b>MIL-101(Cr)/AC-2<sup>e</sup></b>                  | 6        | NIL            |

<sup>a</sup>Reaction conditions: 9.2 mmol (851 mg) epichlorohydrin, 30 mg catalyst and 0.92 mmol TBA<sup>+</sup>Br<sup>-</sup> under 1 bar CO<sub>2</sub> and 30 °C. Conversion (%) were calculated from the <sup>1</sup>H NMR spectra by integration of epoxide peaks (a) versus cyclic carbonate peaks (a'). <sup>b</sup>Physical mixture; <sup>c</sup>without catalyst; <sup>d</sup>without catalyst at 40 °C; <sup>e</sup>without co-catalyst

## <sup>1</sup>H NMR spectra for the cycloaddition reaction using different catalysts with epichlorohydrin

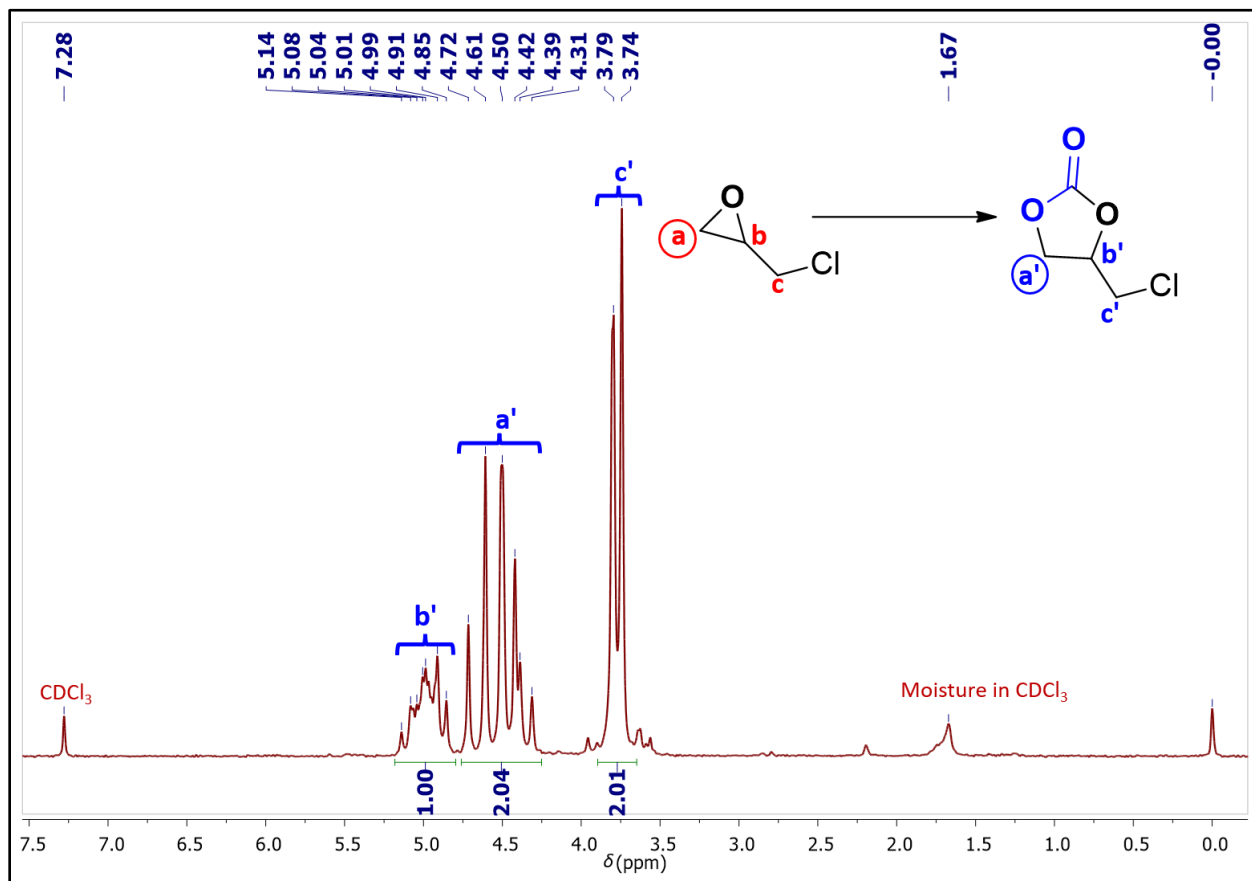

**Fig. S16** The <sup>1</sup>H NMR spectrum (in CDCl<sub>3</sub>) of the purified product for the cycloaddition reaction of epichlorohydrin with CO<sub>2</sub> using **MIL-101(Cr)/AC-1** as a catalyst. Reaction condition: 9.2 mmol of epichlorohydrin, 0.92 mmol of TBA<sup>+</sup>Br<sup>-</sup> (co-catalyst), 30 mg of catalyst, 30 °C, 1 bar of CO<sub>2</sub>, 24 h. Conversion = **99.9%**

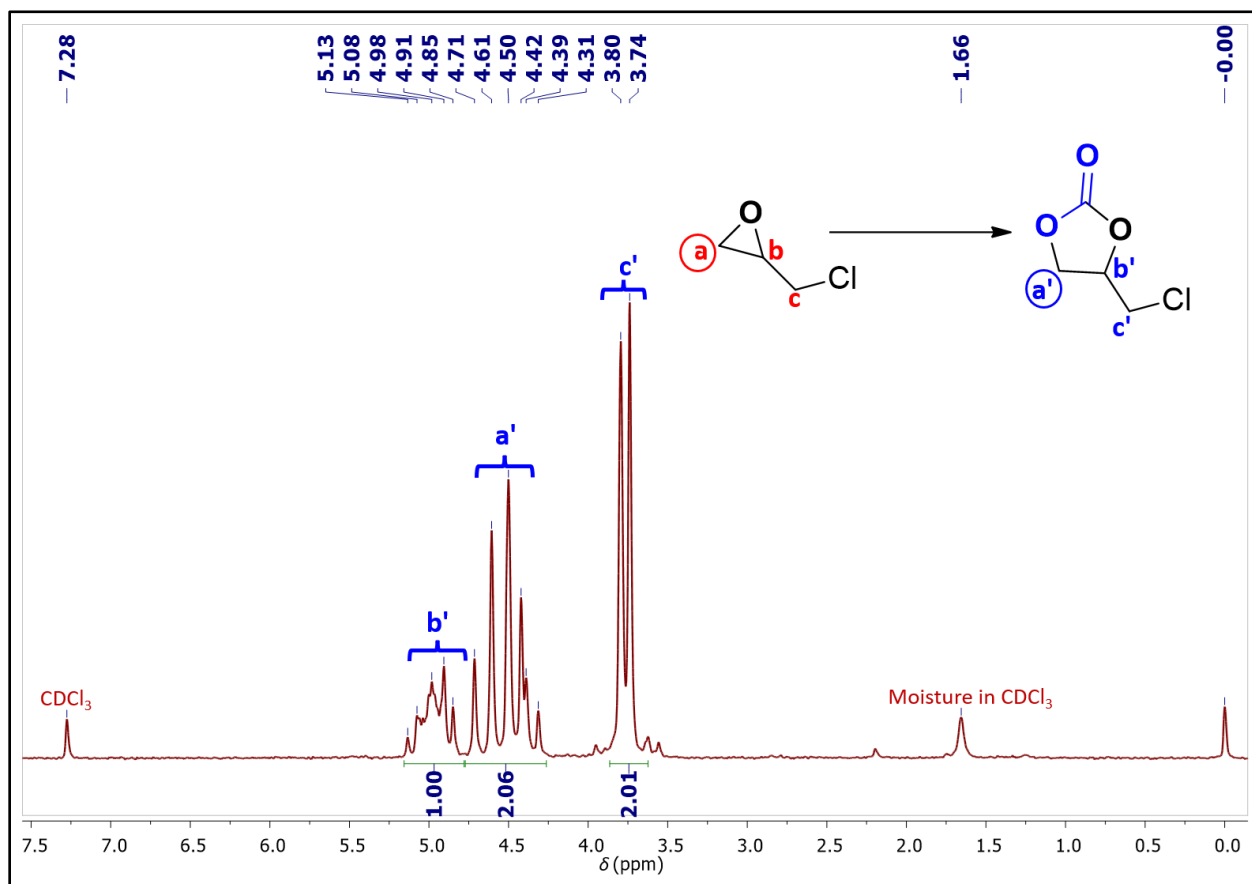

**Fig. S17** The  $^1\text{H}$  NMR spectrum (in CDCl<sub>3</sub>) of the purified product for the cycloaddition reaction of epichlorohydrin with CO<sub>2</sub> using **MIL-101(Cr)/AC-3** as a catalyst. Reaction condition: 9.2 mmol of epichlorohydrin, 0.92 mmol of TBA<sup>+</sup>Br<sup>-</sup> (co-catalyst), 30 mg of catalyst, 30 °C, 1 bar of CO<sub>2</sub>, 16 h. Conversion = **99.9%**

**PXRD patterns of MIL-101(Cr)/AC-2 before catalytic run and after 5<sup>th</sup> cycle of the catalysis**

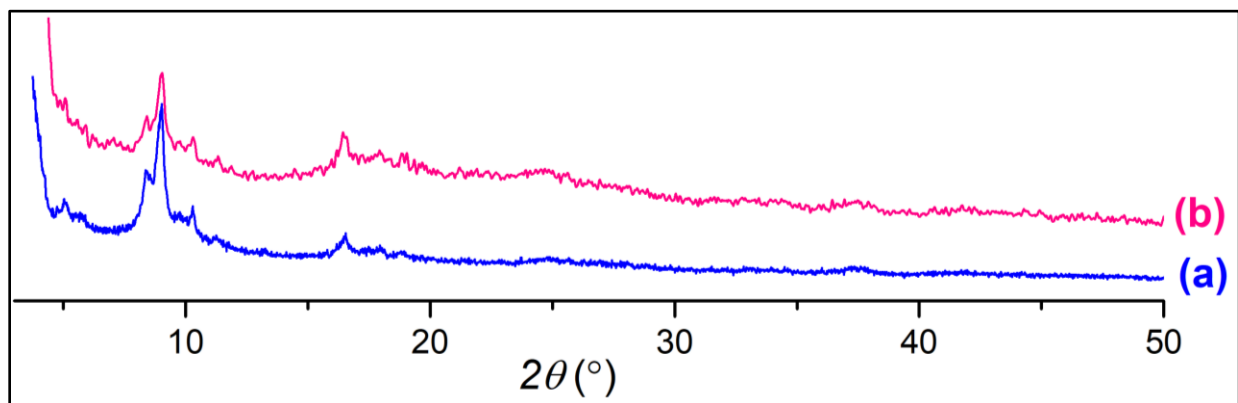

**Fig. S18** PXRD patterns of (a) MIL-101(Cr)/AC-2 before catalytic run and (b) after 5<sup>th</sup> cycle of the catalysis.

**FT-IR spectra of MIL-101(Cr)/AC-2 before catalytic run and after 5<sup>th</sup> cycle of the catalysis**

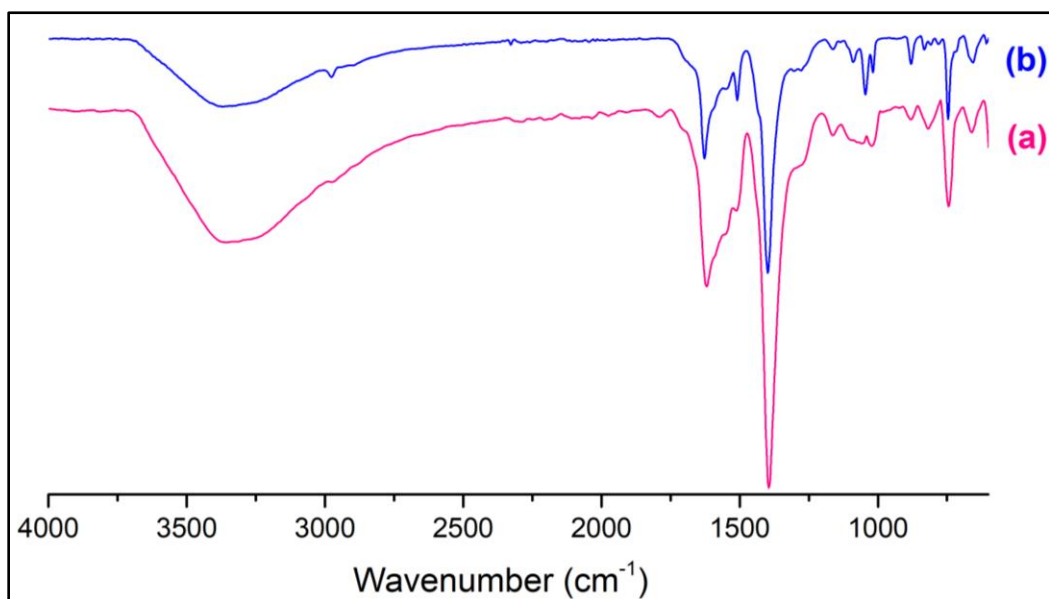

**Fig. S19** FT-IR spectra of (a) after 5<sup>th</sup> cycle of the catalysis and (b) MIL-101(Cr)/AC-2 before catalytic run.



## Optimization table for cycloaddition of CO<sub>2</sub> to styrene oxide using PMIL and MIL-101(Cr)/AC-2 as catalysts

**Table S2** Cycloaddition of CO<sub>2</sub> to styrene oxide using as-synthesized **PMIL** and **MIL-101(Cr)/AC-2** as heterogeneous catalysts<sup>a</sup>

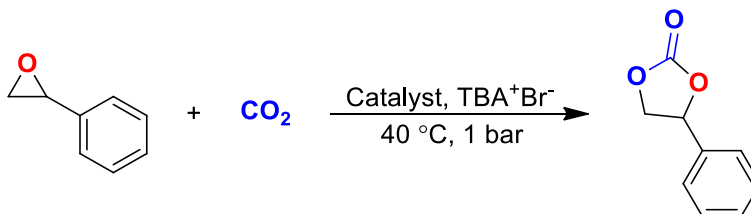

| Entry | Catalysts        | Time (h) | Conversion (%) |
|-------|------------------|----------|----------------|
| 1     | PMIL             | 6        | NIL            |
| 2     | PMIL             | 12       | NIL            |
| 3     | PMIL             | 24       | 5              |
| 4     | PMIL             | 42       | 12             |
| 5     | PMIL             | 48       | 15             |
| 6     | MIL-101(Cr)/AC-2 | 6        | 36.7           |
| 7     | MIL-101(Cr)/AC-2 | 12       | 60             |
| 8     | MIL-101(Cr)/AC-2 | 24       | 71.4           |
| 9     | MIL-101(Cr)/AC-2 | 42       | 92.5           |
| 10    | MIL-101(Cr)/AC-2 | 48       | 99.9           |

<sup>a</sup>Reaction conditions: 9.2 mmol (1105 mg) styrene oxide, 30 mg activated catalyst and 0.92 mmol (296 mg) TBA<sup>+</sup> Br<sup>-</sup> under 1.0 bar CO<sub>2</sub> and 40 °C. Conversion (%) were calculated from the <sup>1</sup>H NMR spectra by integration of epoxide peaks (a) versus cyclic carbonate peaks (a').

## Different substrates and their dimensions

**Table S3** Different substrates and their dimensions<sup>1</sup>

| Substrates                                                                                                  | Dimensions                    |
|-------------------------------------------------------------------------------------------------------------|-------------------------------|
| <br>1,2-epoxy propane      | 4.34 X 3.41 Å <sup>2</sup>    |
| <br>1,2-epoxy butane       | 5.648 X 3.39 Å <sup>2</sup>   |
| <br>1,2-epoxy hexane       | 8.198 X 3.39 Å <sup>2</sup>   |
| <br>Allyl glycidyl ether   | ~8.901 X 3.140 Å <sup>2</sup> |
| <br>Butyl glycidyl ether | ~10.46 X 3.14 Å <sup>2</sup>  |

**$^1\text{H}$  NMR spectra for the cycloaddition reaction using MIL-101(Cr)/AC-2 as a catalyst with different substrates**

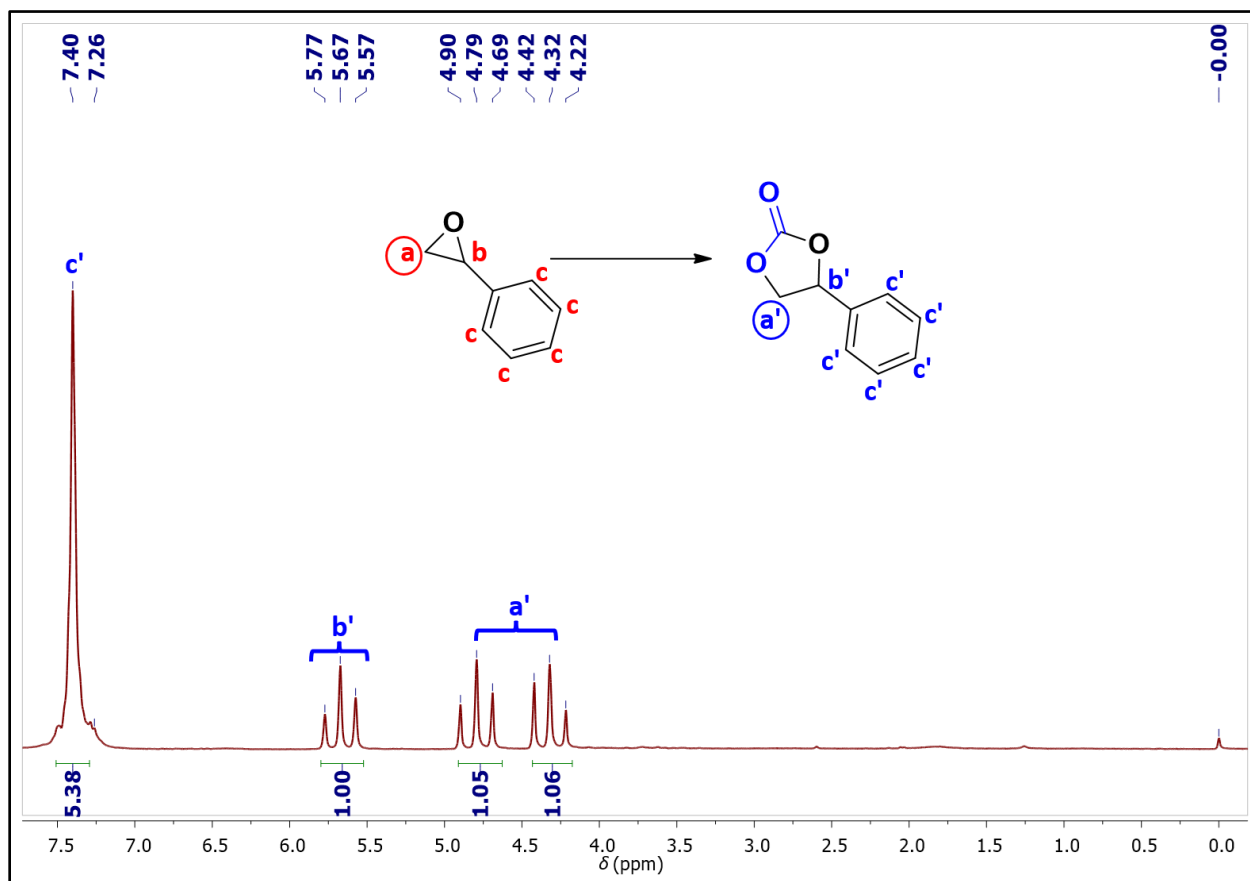

**Fig. S20** The  $^1\text{H}$  NMR spectrum (in  $\text{CDCl}_3$ ) of the purified product for the cycloaddition reaction of styrene oxide with  $\text{CO}_2$  using **MIL-101(Cr)/AC-2** as a catalyst. Reaction condition: 9.2 mmol of epichlorohydrin, 0.92 mmol of  $\text{TBA}^+\text{Br}^-$  (co-catalyst), 30 mg of catalyst, 40  $^\circ\text{C}$ , 1 bar of  $\text{CO}_2$ , 48 h. Conversion = **99.9%**

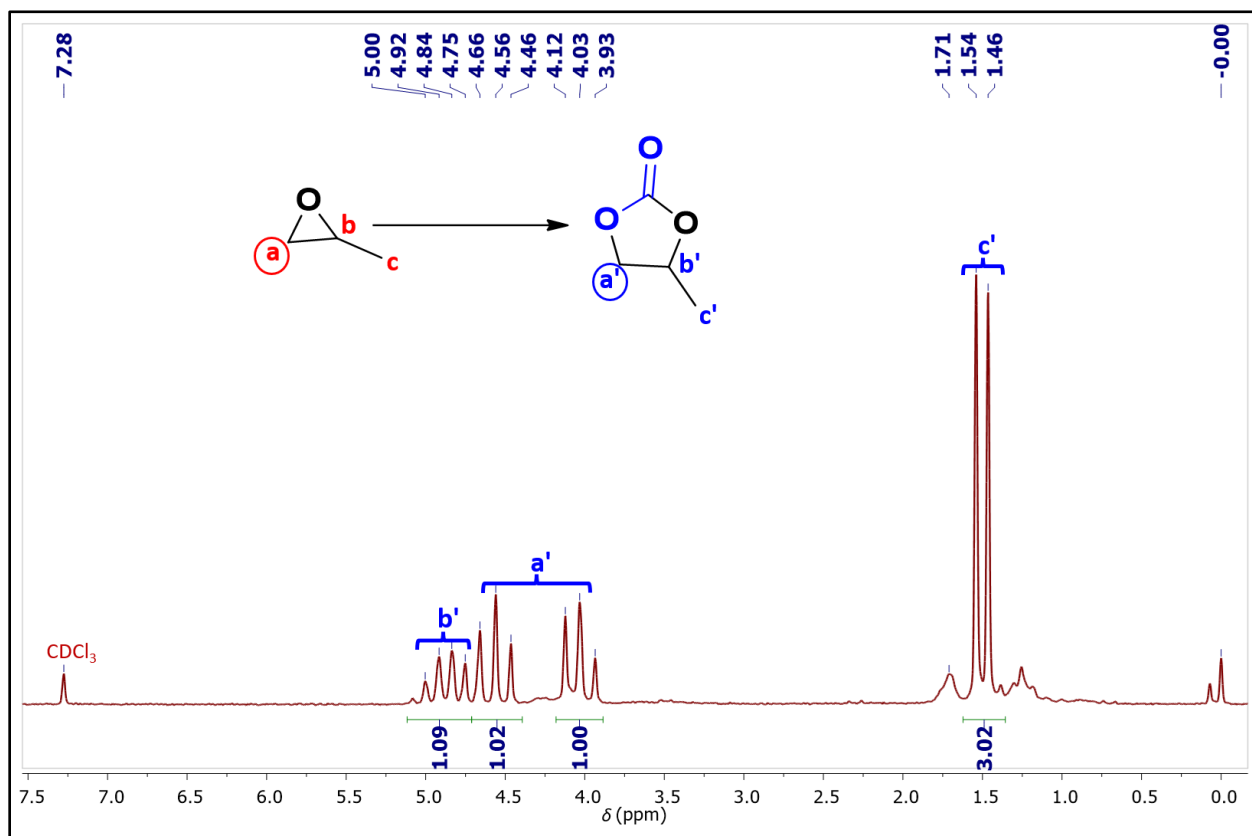

**Fig. S21** The <sup>1</sup>H NMR spectrum (in CDCl<sub>3</sub>) of the purified product for the cycloaddition reaction of propylene oxide with CO<sub>2</sub> using **MIL-101(Cr)/AC-2** as a catalyst. Reaction condition: 9.2 mmol of epichlorohydrin, 0.92 mmol of TBA<sup>+</sup>Br<sup>-</sup> (co-catalyst), 30 mg of catalyst, 30 °C, 1 bar of CO<sub>2</sub>, 6 h. Conversion = **99.9%**

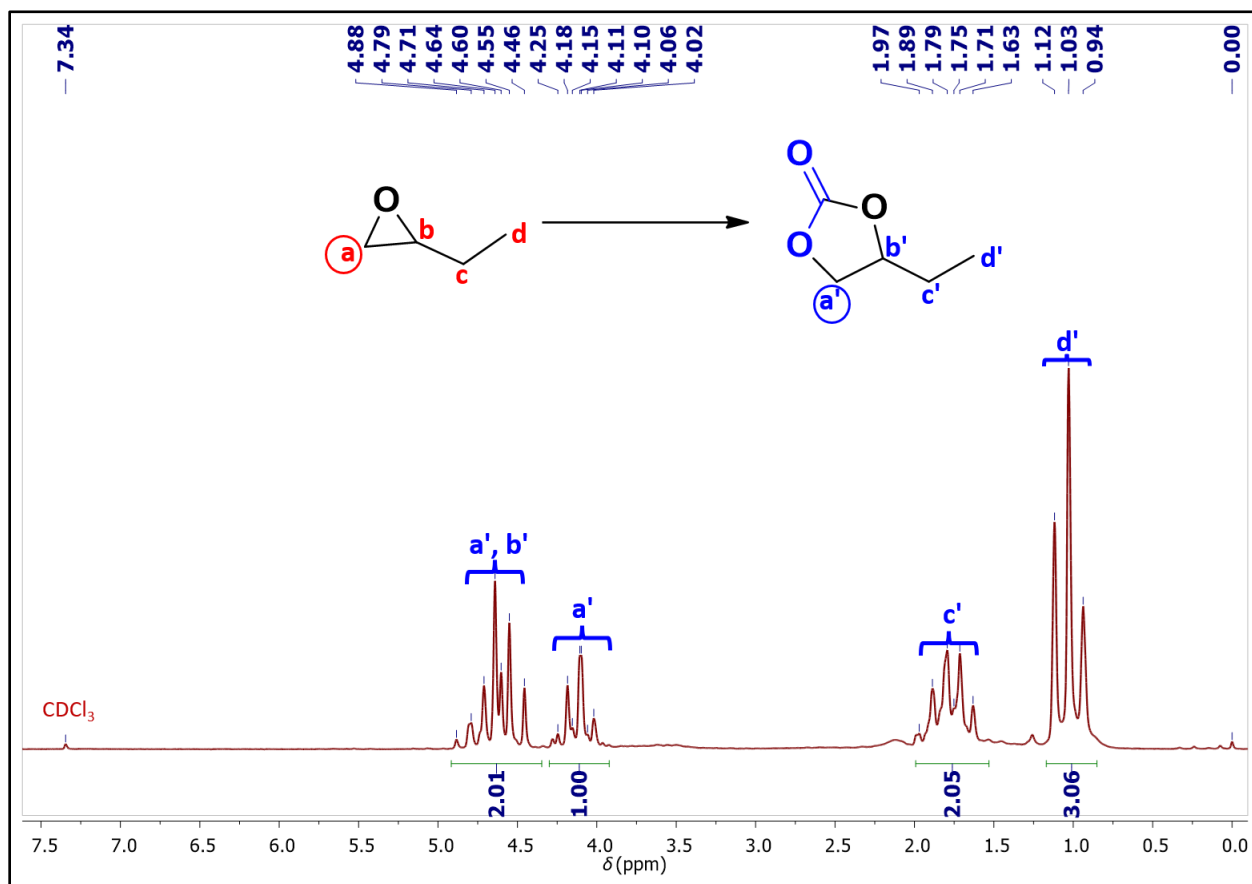

**Fig. S22** The  $^1\text{H}$  NMR spectrum (in  $\text{CDCl}_3$ ) of the purified product for the cycloaddition reaction of 1,2-epoxybutane with  $\text{CO}_2$  using **MIL-101(Cr)/AC-2** as a catalyst. Reaction condition: 9.2 mmol of epichlorohydrin, 0.92 mmol of  $\text{TBA}^+\text{Br}^-$  (co-catalyst), 30 mg of catalyst, 40  $^\circ\text{C}$ , 1 bar of  $\text{CO}_2$ , 6 h. Conversion = **99.9%**

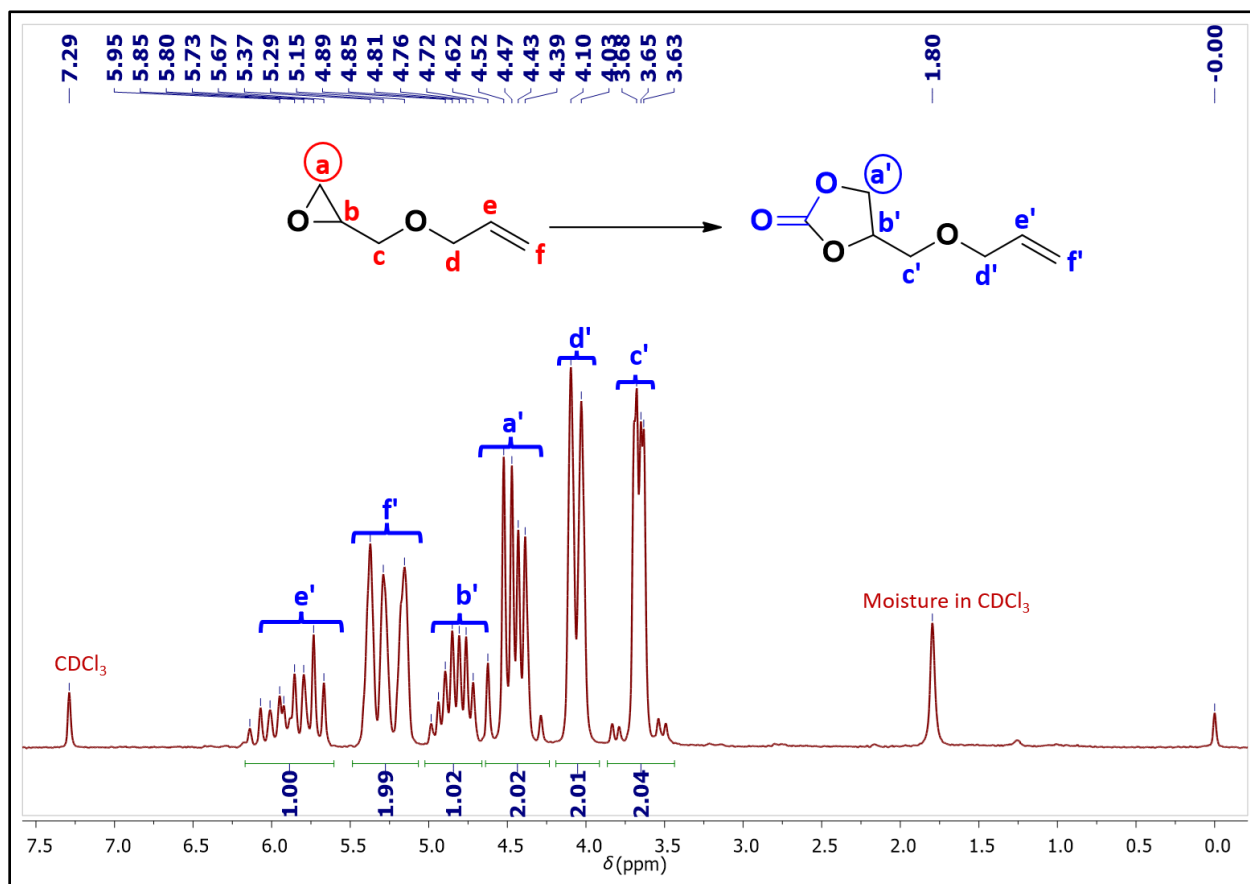

**Fig. S23** The  $^1\text{H}$  NMR spectrum (in  $\text{CDCl}_3$ ) of the purified product for cycloaddition reaction of allyl glycidyl ether with  $\text{CO}_2$  using **MIL-101(Cr)/AC-2** as a catalyst. Reaction condition: 9.2 mmol of epichlorohydrin, 0.92 mmol of  $\text{TBA}^+\text{Br}^-$  (co-catalyst), 30 mg of catalyst,  $40^\circ\text{C}$ , 1 bar of  $\text{CO}_2$ , 12 h. Conversion = 99.9%

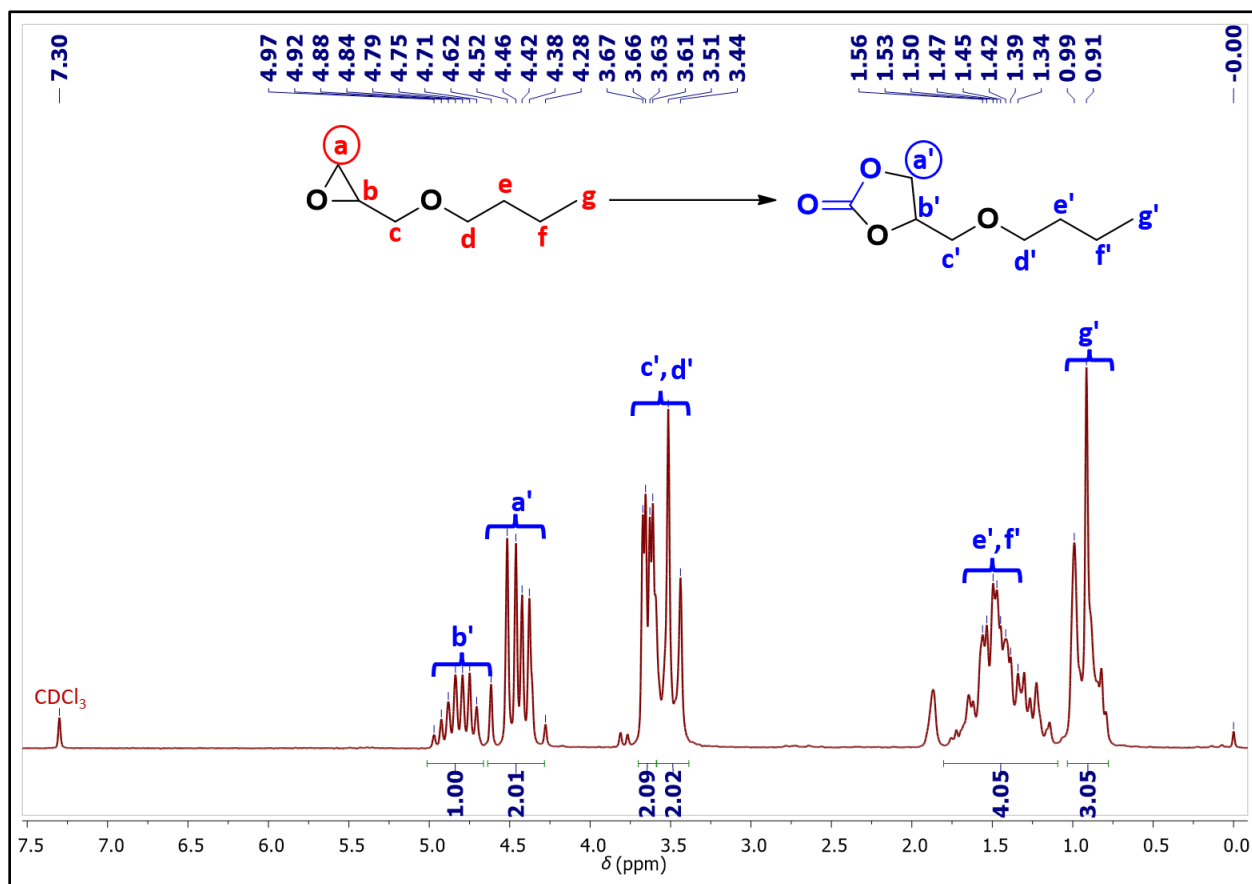

**Fig. S24** The  $^1\text{H}$  NMR spectrum (in  $\text{CDCl}_3$ ) of the purified product for cycloaddition reaction of butyl glycidyl ether with  $\text{CO}_2$  using **MIL-101(Cr)/AC-2** as a catalyst. Reaction condition: 9.2 mmol of epichlorohydrin, 0.92 mmol of  $\text{TBA}^+\text{Br}^-$  (co-catalyst), 30 mg of catalyst,  $40^\circ\text{C}$ , 1 bar of  $\text{CO}_2$ , 15 h. Conversion = **99.9%**

## A comparison of the catalytic activity of different MIL-101(Cr)-based MOF catalysts with MIL-101(Cr)/AC-2

**Table S4** A comparison of the catalytic activity of different MIL-101(Cr)-based MOF catalysts with **MIL-101(Cr)/AC-2** towards the cycloaddition of CO<sub>2</sub> with EPH, PO and SO

| Entry | Catalysts                                       | Substrates <sup>a</sup> | Temperature (°C) | Pressure (bar) | Time (h) | Conversion (%) | Ref. |
|-------|-------------------------------------------------|-------------------------|------------------|----------------|----------|----------------|------|
| 1     | MIL-101(Cr)                                     | EPH                     | 80               | 10             | 2.5      | 11             | 2    |
| 2     | MIL-101(Cr)                                     | PO                      | 100              | 10             | 2.5      | 15.5           | 3    |
| 3     | MIL-101(Cr)                                     | PO                      | 80               | 8              | 4        | 77.2           | 4    |
| 4     | MIL-101(Cr)                                     | PO                      | 25               | 8              | 24       | 91             | 5    |
|       |                                                 | SO                      | 25               | 8              | 48       | 98             |      |
| 5     | MIL-101(Cr)                                     | SO                      | 90               | 5              | 3        | 41.2           | 6    |
| 6     | MIL-101(Cr)                                     | EPH                     | 50               | 1              | 68       | 32             | 7    |
| 7     | MIL-101-NH <sub>2</sub>                         | PO                      | 80               | 20             | 8        | 23.4           | 8    |
| 8     | MIL-101-Br                                      | PO                      | 80               | 20             | 8        | 25.1           |      |
| 9     | MIL-101-NH <sub>2</sub>                         | EPH                     | 90               | 10             | 2        | 17             | 9    |
| 10    | MIL-101-CH <sub>2</sub> Cl                      | PO                      | 80               | 8              | 4        | 90.8           | 4    |
| 11    | MIL-101-N(n-Bu) <sub>3</sub> Br <sup>b</sup>    | PO                      | 80               | 20             | 8        | 99.1           | 8    |
| 12    | Co-POM@MIL-101 <sup>c</sup>                     | EPH                     | 90               | 20             | 2        | 94             | 10   |
|       |                                                 | SO                      | 90               | 20             | 2        | 88             |      |
| 13    | MIL-101-TSIL <sup>d</sup>                       | SO                      | 110              | 20             | 6        | 93.1           | 11   |
|       |                                                 | EPH                     | 110              | 20             | 2        | 81             |      |
| 14    | Cr-MIL-101-[BuPh <sub>3</sub> P]Br <sup>e</sup> | EPH                     | 120              | 20             | 2        | 98.3           | 12   |
|       |                                                 | PO                      | 120              | 20             | 2        | 97.8           |      |
|       |                                                 | SO                      | 120              | 20             | 2        | 68.5           |      |
| 15    | MIL-101(Cr)-DABCO IL <sup>f</sup>               | EPH                     | 100              | 15             | 0.67     | 98.8           | 13   |
|       |                                                 | PO                      | 100              | 15             | 0.67     | 97             |      |
|       |                                                 | SO                      | 100              | 15             | 0.67     | 44.5           |      |
| 16    | MIL-101-tzmOH-Br <sup>g</sup>                   | EPH                     | 120              | 10             | 2        | 97             | 14   |
|       |                                                 | PO                      | 80               | 10             | 10       | 92             |      |
|       |                                                 | SO                      | 80               | 10             | 10       | 57             |      |
| 17    | MIL-101-H/pmtzm-Br <sup>h</sup>                 | SO                      | 80               | 10             | 10       | 73             | 9    |
|       |                                                 | PO                      | 80               | 10             | 2        | 94             |      |
|       |                                                 | EPH                     | 80               | 10             | 2        | 95             |      |
| 18    | MIL-101-IL(BuBr) <sup>i</sup>                   | EPH                     | 110              | 10             | 6        | 92             | 15   |
|       |                                                 | PO                      | 110              | 10             | 6        | 80             |      |
| 19    | Mim-6@MIL-101 <sup>j</sup>                      | EPH                     | 100              | 10             | 2.5      | 95.5           | 3    |
|       |                                                 | PO                      | 100              | 10             | 2.5      | 92.5           |      |
|       |                                                 | SO                      | 100              | 10             | 2.5      | 53.4           |      |
| 20    | MIL-101-tz-TMA-Br <sup>k</sup>                  | EPH                     | 80               | 10             | 4        | 99             | 16   |
| 21    | PIL-COOH@MIL-101 <sup>l</sup>                   | EPH                     | 70               | 10             | 2.5      | 92.7           | 2    |
|       |                                                 | PO                      | 70               | 10             | 2.5      | 88             |      |



|           |                                                    |     |    |    |     |      |                  |
|-----------|----------------------------------------------------|-----|----|----|-----|------|------------------|
|           |                                                    | SO  | 90 | 10 | 2.5 | 80   |                  |
| <b>22</b> | MIL-101-IMBr-6 <sup>m</sup>                        | EPH | 80 | 8  | 4   | 92.3 | 4                |
|           |                                                    | PO  | 80 | 8  | 4   | 95.8 |                  |
|           |                                                    | SO  | 80 | 8  | 4   | 54.7 |                  |
| <b>23</b> | MIL-101-IM <sup>n</sup>                            | PO  | 80 | 8  | 4   | 94.3 |                  |
| <b>24</b> | IL@MIL-101-SO <sub>3</sub> H <sup>o</sup>          | EPH | 90 | 1  | 24  | 98   | 17               |
| <b>25</b> | polyILs@MIL-101 <sup>p</sup>                       | EPH | 70 | 1  | 24  | 94   | 18               |
| <b>26</b> | MIL-101-IP <sup>q</sup>                            | EPH | 50 | 1  | 68  | 32   | 7                |
| <b>27</b> | MIL-101-ImEtOH <sup>r</sup>                        | SO  | 90 | 5  | 3   | 95.6 | 6                |
| <b>28</b> | MIL-101-TzNMe <sub>2</sub> (EtOH)-Br <sup>s</sup>  | EPH | 80 | 10 | 2   | 99   | 19               |
| <b>29</b> | MIL-101-TzmNMe <sub>2</sub> (EtOH)-Br <sup>t</sup> | PO  | 80 | 10 | 1   | 99   |                  |
| <b>30</b> | <b>MIL-101(Cr)/AC-2</b>                            | EPH | 30 | 1  | 6   | 99.9 | <b>This work</b> |
|           |                                                    | PO  | 30 | 1  | 6   | 99.9 |                  |
|           |                                                    | SO  | 40 | 1  | 48  | 99.9 |                  |

<sup>a</sup>**Substrates:** EPH (Epichlorohydrin), PO (Propylene Oxide), SO (Styrene Oxide); <sup>b</sup>**N(n-Bu)<sub>3</sub>Br:** tributylammonium bromide; <sup>c</sup>**Co-POM:** Co-Polyoxometalates; <sup>d</sup>**TSIL:** 1-methylene-3-(4-carboxylbenzyl) imidazolium bromide; <sup>e</sup>**[BuPh<sub>3</sub>P]Br:** n-butyltriphenylphosphonium bromide; <sup>f</sup>**DABCO:** 1,4-Diazabicyclo[2.2.2]octane, **IL:** 2-Bromoethanol; <sup>g</sup>**tzmOH-Br:** hydroxyl-functionalized 1,2,3-triazolium bromide; <sup>h</sup>**pmtzm:** 4(methylpyridinium)-1,2,3-triazolium; <sup>i</sup>**IL:** pyridine-based ionic liquids, BuBr: 1-bromobutene; <sup>j</sup>**Mim:** 1,1'-(Hexane-1,6-diyl)-bis(3-methylimidazolium) Dibromide; <sup>k</sup>**tz-TMA-Br:** N,N,N-trimethyl-1H-1,2,3-triazol-4-aminium bromide; <sup>l</sup>**PIL:** Hydrogen bond donor functionalized poly(ionic liquids); <sup>m</sup>**IMBr:** Imidazolium bromide, <sup>n</sup>**IM:** imidazole; <sup>o</sup>**IL:** 1-methyl-3-(2-aminoethyl)imidazolium bromide; <sup>p</sup>**polyILs:** imidazolium-based poly(ionic liquids); <sup>q</sup>**IP:** Ionic polymer; <sup>r</sup>**ImEtOH:** 2-(1-imidazol-1-yl) ethanol;

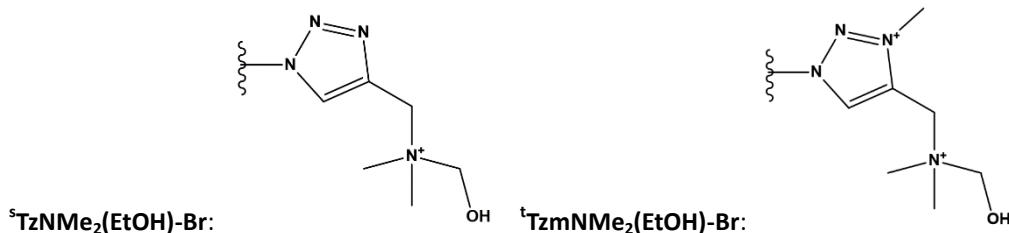

**Entries 1-6** in **Table S4** indicates the catalytic activity of pristine MIL-101(Cr) which exhibits either poor catalytic activity or need higher temperature and high pressure to complete the reactions. Although, it's effectiveness could be improved by the modification in catalyst i.e., by changing substitution in ligand (**Entry 9, Table S4**) or the post-modification in the framework of MIL-101 (in respect of bdc linker) using different groups i.e., NH<sub>2</sub>, Br and CH<sub>2</sub>Cl (**Entries 7, 8, 10 & 11, Table S4**), inclusion of polyoxometalates and ionic liquids inside the porous framework (**Entries 12-29, Table S4**). However, these approaches still require either relatively high temperature and pressure or longer reaction time or the combination of the all the parameters to exhibit a decent catalytic conversion.

## References

1. R. Das, T. Ezhil, A. S. Palakkal, D. Muthukumar, R. S. Pillai and C. M. Nagaraja, *J. Mater. Chem. A*, 2021, **9**, 23127.
2. Y. Jiang, D. Li, Y. Zhao and J. Sun, *J. Colloid Interface Sci.*, 2022, **618**, 22.
3. Y. Jiang, Z. Wang, P. Xu and J. Sun, *Cryst. Growth Des.*, 2021, **21**, 3689.
4. D. Liu, G. Li and H Liu, *Appl. Surf. Sci.*, 2018, **428**, 218.
5. O. V. Zalomaeva, A. M. Chibiryayev, K. A. Kovalenko, O. A. Kholdeeva, B. S. Balzhinimaev and V. P. Fedin, *J. Catal.*, 2013, **298**, 179.
6. Y. Liu, J. Li, Z. Zhang, Y. Hou, L. Wang and J. Zhang, *Inorg. Chem.*, 2022, **61**, 17438.
7. B. Aguila, Q. Sun, X. Wang, E. O' Rourke, A. M. Al-Enizi, A. Nafady and S. Ma, *Angew. Chem. Int. Ed.*, 2018, **57**, 1.
8. D. Ma, B. Li, K. Liu, X. Zhang, W. Zou, Y. Yang, G. Li, Z. Shi and S. Feng, *J. Mater. Chem. A*, 2015, **3**, 23136.
9. W.-S. Liu, L.-J. Zhou, G. Li, S.-L. Yang and E.-Q. Gao, *ACS Sustainable Chem. Eng.*, 2021, **9**, 1880.
10. A. Marandi, M. Bahadori, S. Tangestaninejad, M. Moghadam, V. Mirkhani, I. Mohammadpoor-Baltork, R. Frohnhoven, S. Mathur, A. Sandleben and A. Klein, *New J. Chem.*, 2019, **43**, 15585.
11. M. Bahadori, S. Tangestaninejad, M. Bertmer, M. Moghadam, V. Mirkhani, I. Mohammadpoor-Baltork, R. Kardanpour and F. Zadehahmadi, *ACS Sustainable Chem. Eng.*, 2019, **7**, 3962.
12. M. Y. Zorainy, M. G. Alalm, S. Kaliaguine and D. C. Boffito, *J. Mater. Chem. A*, 2021, **9**, 22159.
13. J. Long, W. Dai, M. Zou, B. Li, S. Zhang, L. Yang, J. Mao, P. Mao, S. Luo and X. Luo, *Microporous Mesoporous Mater.*, 2021, **318**, 111027.
14. L.-J. Zhou, W. Sun, N.-N. Yang, P. Li, T. Gong, W.-J. Sun, Q. Sui and E.-Q. Gao, *ChemSusChem*, 2019, **12**, 2202.
15. F. Li, Y. Chen, A. Gao, W. Tong, C. Ji, Y. Cheng and Y.-H. Zhou, *New J. Chem.*, 2022, **46**, 18418.

16. L.-F. Xiong, L.-J. Zhou, R. Bu, S.-L. Yang and E.-Q. Gao, *Microporous Mesoporous Mater.*, 2022, **330**, 111601.
17. Y. Sun, H. Huang, H. Vardhan, B. Aguila, C. Zhong, J. A. Perman, A. M. Al-Enizi, A. Nafady and S. Ma, *ACS Appl. Mater. Interfaces*, 2018, **10**, 27124.
18. M. Ding and H.-L. Jiang, *ACS Catal.*, 2018, **8**, 3194.
19. L.-F. Xiong, R. Bu, S.-L. Yang and E.-Q. Gao, *Microporous Mesoporous Mater.*, 2022, **339**, 111984.
